# Supplementary material for: Efficacy of Smartphone Active and Passive Virtual Reality Distraction vs Standard Care on Burn Pain Among Pediatric Patients: A Randomized Clinical Trial
Source: PubMed Central journal article supplement (PMC8218073; doi:10.1001/jamanetworkopen.2021.12082), 2021-06-21
Supplement: jamanetwopen-e2112082-s002.pdf [file jamanetwopen-e2112082-s002.pdf]

## Supplemental Online Content

Xiang H, Shen J, Wheeler KK, et al. Efficacy of smartphone active and passive virtual reality distraction vs standard care on burn pain among pediatric patients: a randomized clinical trial. *JAMA Netw Open*. 2021;4(6):e2112082. doi:10.1001/jamanetworkopen.2021.12082

**eFigure.** Smartphone VR-PAT

**eTable 1.** Subgroup Analysis: Mean Pain Score by Distraction Type and Race

**eTable 2.** Univariate Linear Regression Analysis of Demographic and Burn Characteristics, Pain Medication Prior to Burn Dressing, Child Expectation of VR, and VR Group on Pain Scores, All Children

**eTable 3.** Multivariate Linear Regression Analysis of Demographic and Burn Characteristics, Child Expectation of VR, and VR Group on Pain Scores Among Children Who Did Not Use Pain Medication Within 6 Hours of Burn Dressing

**eTable 4.** Multivariate Linear Regression Analysis of Demographic and Burn Characteristics, Child Expectation of VR, and VR Group on Pain Scores Among Children Who Did Use Pain Medication Within 6 Hours of Burn Dressing

**eTable 5.** Pediatric Patients With Burns Reported VR Experiences

**eTable 6.** Secondary Outcomes of VR Game Experience of Pediatric Patients With Burns

This supplemental material has been provided by the authors to give readers additional information about their work.

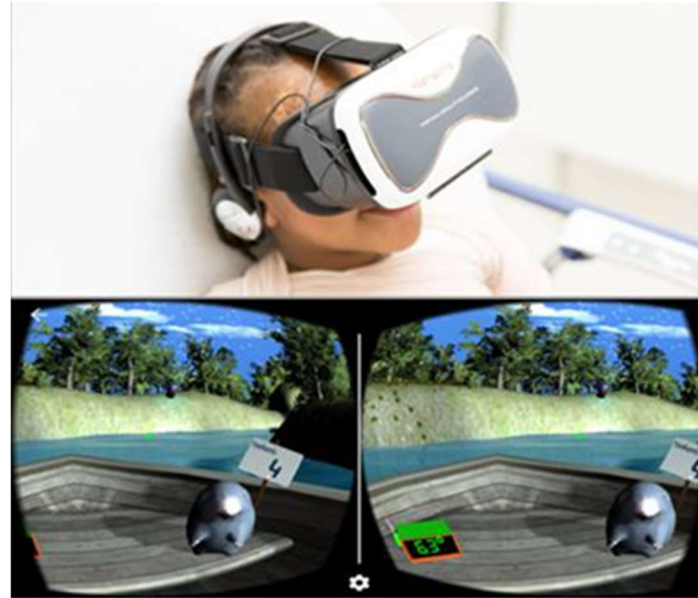

**eFigure.** Smartphone VR-PAT

**eTable 1. Subgroup Analysis: Mean Pain Score by Distraction Type and Race**

|                                   | Distraction Type |            |                   |            |                |             | P-value <sup>1</sup> |
|-----------------------------------|------------------|------------|-------------------|------------|----------------|-------------|----------------------|
|                                   | Active VR (N=31) |            | Passive VR (N=30) |            | Control (N=29) |             |                      |
|                                   | Median           | (Q1, Q3)   | Median            | (Q1, Q3)   | Median         | (Q1, Q3)    |                      |
| <b>Observed Pain</b>              |                  |            |                   |            |                |             |                      |
| White                             | 10.0             | (0.0,20.0) | 0.0               | (0.0,20.0) | 30.0           | (0.0,40.0)  | 0.3                  |
| Non-White                         | 5.0              | (0.0,30.0) | 0.0               | (0.0,50.0) | 15.0           | (10.0,40.0) | 0.9                  |
| <b>Self-reported Overall Pain</b> |                  |            |                   |            |                |             |                      |
| White                             | 5.0              | (0.0,49.0) | 8.0               | (0.0,70.0) | 33.0           | (1.0,70.0)  | 0.4                  |
| Non-White                         | 9.0              | (0.0,63.0) | 10.0              | (0.0,60.0) | 59.5           | (10.0,100)  | 0.3                  |
| <b>Self-reported Worst Pain</b>   |                  |            |                   |            |                |             |                      |
| White                             | 11.0             | (0.0,53.0) | 50.0              | (0.0,96.0) | 34.0           | (1.0,80.0)  | 0.3                  |
| Non-White                         | 13.5             | (0.0,48.5) | 50.0              | (0.0,88.0) | 70.0           | (0.0,100)   | 0.2                  |

Note: <sup>1</sup>P-value from ANOVA when comparing the means across the three distraction groups

Q1=first quartile (25th percentile), Q3=third quartile (75th percentile)

**eTable 2.** Univariate Linear Regression Analysis of Demographic and Burn Characteristics, Pain Medication Prior to Burn Dressing, Child Expectation of VR, and VR Group on Pain Scores, All Children

| Variable                                             | Observed Pain Score |               |         | Self-reported Overall Pain Score |                |         | Self-reported Worst Pain Score |                |         |
|------------------------------------------------------|---------------------|---------------|---------|----------------------------------|----------------|---------|--------------------------------|----------------|---------|
|                                                      | Parameter estimate  | 95% CI        | P-value | Parameter estimate               | 95% CI         | P-value | Parameter estimate             | 95% CI         | P-value |
| Age                                                  | -2.49               | (-4.12,-0.85) | <0.01   | -2.81                            | (-5.20,-0.43)  | 0.02    | -2.51                          | (-5.02,-0.01)  | 0.05    |
| Gender                                               | 4.00                | (-7.41,15.41) | 0.49    | 4.60                             | (-11.73,20.93) | 0.58    | 4.44                           | (-12.57,21.46) | 0.61    |
| Race(White vs.Non-White)                             | -2.84               | (14.3,8.69)   | 0.62    | -10.93                           | (-27.3,5.41)   | 0.19    | -8.63                          | (-25.72,8.47)  | 0.32    |
| STAQI_CH_score                                       | 1.72                | (-0.09,3.52)  | 0.06    | 3.00                             | (0.45,5.56)    | 0.02    | 2.26                           | (-0.44,4.96)   | 0.10    |
| TBSA (%)                                             | 3.02                | (1.67,4.36)   | <0.01   | 1.78                             | (-0.38,3.94)   | 0.10    | 1.99                           | (-0.27,4.26)   | 0.08    |
| Burn_degree                                          | 30.93               | (10.95,50.91) | <0.01   | 21.56                            | (-7.97,51.01)  | 0.15    | 25.49                          | (-5.1,56.07)   | 0.10    |
| Used pain medication within 6 hours of burn dressing | 16.25               | (4.41,28.07)  | <0.01   | 20.56                            | (3.65,37.47)   | 0.02    | 20.67                          | (2.95,38.38)   | 0.02    |
| Active VR vs. Control                                | -9.04               | (-23.01,4.92) | 0.20    | -22.20                           | (-41.80,-2.60) | 0.03    | -21.34                         | (-41.69,-0.98) | 0.04    |
| Passive VR vs. Control                               | -4.84               | (-18.91,9.23) | 0.50    | -11.34                           | (-31.09,8.42)  | 0.26    | -0.89                          | (-21.41,19.63) | 0.93    |
| Child expectation of VR fun for dressing             | 0.45                | (0.17,0.72)   | <0.01   | 0.44                             | (0.03,0.85)    | 0.04    | 0.20                           | (-0.24,0.64)   | 0.36    |
| Child expectation of helpfulness of VR               | -0.11               | (-0.31,0.08)  | 0.26    | -0.13                            | (-0.41,0.16)   | 0.38    | -0.13                          | (-0.42,0.17)   | 0.39    |

STAQI-CH = State-Trait Anxiety Inventory for Children, TBSA (%)=Total body surface area of burn, 95% CI=95% confidence interval

**eTable 3.** Multivariate Linear Regression Analysis of Demographic and Burn Characteristics, Child Expectation of VR, and VR Group on Pain Scores Among Children Who Did Not Use Pain Medication Within 6 Hours of Burn Dressing

| Variable                                 | Observed Pain Score |                |         | Self-reported Overall Pain Score |                |         | Self-reported Worst Pain Score |                |         |
|------------------------------------------|---------------------|----------------|---------|----------------------------------|----------------|---------|--------------------------------|----------------|---------|
|                                          | Parameter estimate  | 95% CI         | P-value | Parameter estimate               | 95% CI         | P-value | Parameter estimate             | 95% CI         | P-value |
| Age                                      | -0.00               | (-1.68,1.68)   | 0.99    | 0.13                             | (-2.92,3.18)   | 0.93    | -0.81                          | (-4.26,2.64)   | 0.64    |
| Gender                                   | 1.49                | (-9.03,12.02)  | 0.78    | 7.42                             | (-11.63,26.46) | 0.44    | 6.88                           | (-14.67,28.43) | 0.52    |
| Race(White vs.Non-White)                 | -6.70               | (-17.24,3.84)  | 0.21    | -22.05                           | (-41.12,-2.97) | 0.02    | -17.07                         | (-38.65,4.52)  | 0.12    |
| STAQI_CH_score                           | -0.20               | (-1.81,1.42)   | 0.81    | 1.06                             | (-1.87,3.99)   | 0.47    | 0.14                           | (-3.17,3.46)   | 0.93    |
| TBSA (%)                                 | 2.98                | (1.26,4.69)    | <0.01   | 2.25                             | (-0.86,5.36)   | 0.15    | 1.93                           | (-1.59,5.45)   | 0.28    |
| Burn_degree                              | -0.25               | (-29.36,28.86) | 0.98    | 8.31                             | (-44.37,60.98) | 0.75    | 7.30                           | (-52.32,66.90) | 0.81    |
| Active VR vs. Control                    | -7.32               | (-20.43,5.79)  | 0.27    | -26.39                           | (-50.12,-2.67) | 0.03    | -17.23                         | (-44.08,9.61)  | 0.20    |
| Passive VR vs. Control                   | -6.03               | (-18.74,6.69)  | 0.35    | -24.09                           | (-47.11,-1.09) | 0.04    | -6.80                          | (-32.84,19.24) | 0.60    |
| Child expectation of VR fun for dressing | 0.33                | (0.03,0.63)    | 0.03    | 0.50                             | (-0.03,1.05)   | 0.07    | 0.24                           | (-0.37,0.87)   | 0.43    |
| Child expectation of helpfulness of VR   | -0.13               | (-0.33,0.06)   | 0.17    | -0.31                            | (-0.66,0.05)   | 0.09    | -0.31                          | (-0.71,0.09)   | 0.13    |

STAQI-CH = State-Trait Anxiety Inventory for Children, TBSA (%)=Total body surface area of burn, 95% CI=95% confidence interval

**eTable 4.** Multivariate Linear Regression Analysis of Demographic and Burn Characteristics, Child Expectation of VR, and VR Group on Pain Scores Among Children Who Did Use Pain Medication Within 6 Hours of Burn Dressing

| Variable                                                                                                                        | Observed Pain Score |                |         | Self-reported Overall Pain Score |                |         | Self-reported Worst Pain Score |                 |         |
|---------------------------------------------------------------------------------------------------------------------------------|---------------------|----------------|---------|----------------------------------|----------------|---------|--------------------------------|-----------------|---------|
|                                                                                                                                 | Parameter estimate  | 95% CI         | P-value | Parameter estimate               | 95% CI         | P-value | Parameter estimate             | 95% CI          | P-value |
| Age                                                                                                                             | -2.72               | (-6.22,0.78)   | 0.12    | -5.45                            | (-10.23,-0.66) | 0.03    | -4.67                          | (-10.21,0.86)   | 0.09    |
| Gender                                                                                                                          | -11.90              | (-34.54,10.74) | 0.29    | 10.92                            | (-20.03,41.89) | 0.47    | 10.11                          | (-25.71,45.92)  | 0.56    |
| Race(White vs.Non-White)                                                                                                        | -1.14               | (-33.74,31.46) | 0.94    | 6.48                             | (-38.09,51.06) | 0.76    | 26.72                          | (-24.85,78.29)  | 0.29    |
| STAQI_CH_score                                                                                                                  | 2.40                | (-2.34,7.14)   | 0.30    | 5.46                             | (-1.01,11.94)  | 0.09    | 6.85                           | (-0.64,14.34)   | 0.07    |
| TBSA (%)                                                                                                                        | 3.25                | (-1.29,7.80)   | 0.15    | -2.43                            | (-8.65,3.78)   | 0.43    | -0.55                          | (-7.75,6.63)    | 0.87    |
| Burn_degree                                                                                                                     | -14.85              | (-60.95,31.24) | 0.51    | -18.69                           | (-81.73,44.35) | 0.54    | -27.28                         | (-100.21,45.64) | 0.44    |
| Active VR vs. Control                                                                                                           | 22.24               | (-6.36,50.85)  | 0.12    | -14.83                           | (-53.95,24.29) | 0.43    | -37.85                         | (-83.10,7.40)   | 0.09    |
| Passive VR vs. Control                                                                                                          | 14.93               | (-11.47,41.33) | 0.25    | 22.11                            | (-13.98,58.21) | 0.22    | 21.30                          | (-20.45,63.06)  | 0.30    |
| Child expectation of VR need for dressing                                                                                       | 0.79                | (0.12,1.45)    | 0.02    | -0.36                            | (-1.27,0.54)   | 0.41    | -0.67                          | (-1.72,0.38)    | 0.20    |
| Child expectation of helpfulness of VR                                                                                          | -0.25               | (-0.71,0.21)   | 0.26    | 0.18                             | (-0.44,0.80)   | 0.55    | 0.45                           | (-0.26,1.18)    | 0.20    |
| STAQI-CH = State-Trait Anxiety Inventory for Children, TBSA (%)=Total body surface area of burn, 95% CI=95% confidence interval |                     |                |         |                                  |                |         |                                |                 |         |

**eTable 5.** Pediatric Patients With Burns Reported VR Experiences

|                                          | Distraction type    |                   |
|------------------------------------------|---------------------|-------------------|
|                                          | Active VR<br>(N=31) | Passive VR (N=30) |
|                                          | Mean (95% CI)       | Mean (95% CI)     |
| Fun (0-100, the higher the better)       | 85.7 (76.6,94.7)    | 77.3 (65.6,89.0)  |
| Engaging (0-100, the higher the better)  | 78.9 (68.5,89.3)    | 72.7 (59.9,85.5)  |
| Realistic (0-100, the higher the better) | 73.1 (62.3,83.8)    | 59.1 (44.7,73.5)  |

95% CI=95% confidence interval

**eTable 6.** Secondary Outcomes of VR Game Experience of Pediatric Patients With Burns

|                                                                                | Distraction type     |                     |                      |
|--------------------------------------------------------------------------------|----------------------|---------------------|----------------------|
|                                                                                | Active VR (N=31)     | Passive VR (N=30)   | Control (N=29)       |
| <b>Child reported game satisfaction <sup>1</sup></b>                           |                      |                     |                      |
| Happy with the VR game                                                         | 30(97%)              | 27(90%)             | -                    |
| Would use it again in future dressing changes                                  | 29(94%)              | 27(90%)             | -                    |
| <b>Caregiver reported game satisfaction <sup>1</sup></b>                       |                      |                     |                      |
| Happy with the VR game                                                         | 31(100%)             | 29(97%)             | -                    |
| Would use it again in future dressing changes                                  | 30(97%)              | 29(97%)             | -                    |
|                                                                                | <b>Mean (95% CI)</b> | <b>Mean (95%CI)</b> | <b>Mean (95% CI)</b> |
| <b>Child report – Time spent thinking about pain (0 to 100) <sub>2,3</sub></b> | 20.3 (8.9,31.8)      | 34.6 (20.2,49.0)    | 36.5 (20.8,52.2)     |
| <b>Clinician reported utility <sup>1</sup></b>                                 |                      |                     |                      |
| Helpfulness (0-100, higher better)                                             | 84.2 (74.5,93.8)     | 76.9 (65.2,88.7)    | -                    |
| Easiness (0-100, higher better)                                                | 94.8 (91.8,97.8)     | 96.0 (92.9,99.1)    | -                    |
| <b>Length of dressing change (minutes) <sup>3</sup></b>                        | 5.2 (4.0,6.4)        | 4.5 (3.2,5.7)       | 3.3 (1.9,4.7)        |
| <b>Simulation sickness (0-60, lower better)</b>                                | 19.3(17.5,21.1)      | 19.5(17.6,21.5)     |                      |

<sup>1</sup> These questions were not asked for children in the control group

<sup>2</sup> Scale = 0-not at all to 100-very much

<sup>3</sup> Differences in the means by three groups were not statistically significant

95% CI=95% confidence interval
