# Supplementary material for: Efficacy of Smartphone Active and Passive Virtual Reality Distraction vs Standard Care on Burn Pain Among Pediatric Patients: A Randomized Clinical Trial
Source: PubMed Central journal article supplement (PMC8218073; doi:10.1001/jamanetworkopen.2021.12082), 2021-06-21
Supplement: jamanetwopen-e2112082-s003.pdf [file jamanetwopen-e2112082-s003.pdf]

## Data Sharing Statement

Xiang. Efficacy of Smartphone Active and Passive Virtual Reality Distraction vs Standard Care on Burn Pain Among Pediatric Patients. *JAMA Netw Open*. Published June 21, 2021. doi:10.1001/jamanetworkopen.2021.12082

### Data

**Data available:** Yes

**Data types:** Deidentified participant data

**How to access data:** Patient data are not allowed by our institute (Nationwide Children's Hospital) to share. De-identified data may be available but our legal department must be involved in the negotiation with the requester. Email: [xiang.30@osu.edu](mailto:xiang.30@osu.edu)

**When available:** With publication

### Supporting Documents

**Document types:** None

### Additional Information

**Who can access the data:** Researchers whose proposed use of the data has been approved, and a data use agreement has been negotiated with legal department of Nationwide Children's Hospital.

**Types of analyses:** For any purpose or for a specified purpose.

**Mechanisms of data availability:** After approval of a proposal.
